# Supplementary material for: Effect of chitosan quaternary ammonium salt on the growth and microcystins release of Microcystis aeruginosa
Source: Royal Society of Chemistry journal article supplement (doi:10.1039/c6ra11789a), 2016-01-01
Supplement: c6ra11789a1.pdf [file c6ra11789a1.pdf]

Supplementary Information for:

**Effect of chitosan quaternary ammonium salt on the growth and microcystins release of *Microcystis aeruginosa***

Yaowen Zhu<sup>a</sup>, Haiyan Pei<sup>a, b \*</sup>, Wenrong Hu<sup>a, b</sup>, Yan Jin<sup>a</sup>, Hangzhou Xu<sup>a</sup>, Ying Ren<sup>a</sup>,  
Di Xue<sup>a</sup>

<sup>a</sup>School of Environmental Science and Engineering, Shandong University, Jinan, 250100, China.

<sup>b</sup>Shandong provincial engineering center on Environmental Science and Technology, Jinan, 250061, China.

\*Corresponding author: School of Environmental Science and Engineering, Shandong University, Jinan 250100, P. R. China  
Tel./Fax: +86-531-88392983  
E-mail address: [haiyanhup@126.com](mailto:haiyanhup@126.com).

**Supplementary Data**

Number of pages: 2

Number of figures: 1

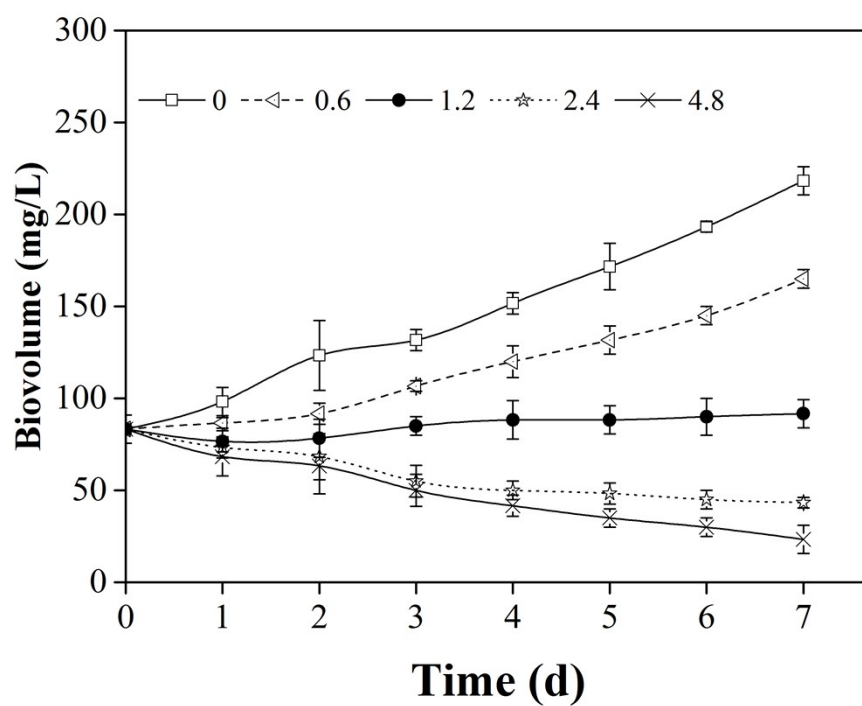

**Fig. S1** The changes of biovolume of *M. aeruginosa*. at different HTCC dose during experimental time.
